# Supplementary material
Source: PubMed Central journal article supplement (PMC4294236)
Supplement: IAI.02722-14_zii999091054so1.pdf [file IAI.02722-14_zii999091054so1.pdf]

## Supplementary Information

### ***bis*-Molybdopterin guanine dinucleotide is required for persistence of *Mycobacterium tuberculosis* in guinea pigs**

Monique J. Williams,<sup>a,b</sup> Crystal A. Shanley,<sup>c</sup> Andrew Zilavy,<sup>c</sup> Blas Peixoto,<sup>d</sup> Claudia Manca,<sup>d</sup> Gilla Kaplan,<sup>d</sup> Ian M. Orme,<sup>c</sup> Valerie Mizrahi,<sup>b</sup> Bavesh D. Kana<sup>e</sup>

MRC Centre for Tuberculosis Research, Division of Molecular Biology and Human Genetics, Faculty of Medicine and Health Sciences, Stellenbosch University, South Africa<sup>a</sup>;

MRC/NHLS/UCT Molecular Mycobacteriology Research Unit and DST/NRF Centre of Excellence for Biomedical TB Research, Institute of Infectious Disease & Molecular Medicine and Division of Medical Microbiology, University of Cape Town, South Africa<sup>b</sup>;

Mycobacteria Research Laboratories, Department of Microbiology, Immunology and Pathology, Colorado State University, Fort Collins, USA<sup>c</sup>; Laboratory of Mycobacterial Immunity and Pathogenesis, The Public Health Research Institute, New Jersey Medical School, Rutgers The State University of New Jersey, Newark, USA<sup>d</sup>;

DST/NRF Centre of Excellence for Biomedical TB Research, Faculty of Health Sciences, University of the Witwatersrand, National Health Laboratory Service, Johannesburg, South Africa<sup>e#</sup>

Running Head: Molybdenum cofactor in *M. tuberculosis*

#Address correspondence to: Bavesh D. Kana, [bavesh.kana@nhls.ac.za](mailto:bavesh.kana@nhls.ac.za)

**Table S1:** Strains, plasmids and primers used in this study

| Name                                                       | Description                                                                                                                                                                                                                        | Source/<br>reference |
|------------------------------------------------------------|------------------------------------------------------------------------------------------------------------------------------------------------------------------------------------------------------------------------------------|----------------------|
| <u>Strains</u>                                             |                                                                                                                                                                                                                                    |                      |
| <u><i>M. tuberculosis</i></u>                              |                                                                                                                                                                                                                                    |                      |
| H37Rv                                                      | ATCC 25618; virulent laboratory strain                                                                                                                                                                                             | Laboratory stock     |
| $\Delta mobA$                                              | Derivative of H37Rv carrying an unmarked deletion of the <i>mobA</i> gene;                                                                                                                                                         | This work            |
| $\Delta mobA attB::pMobA$                                  | Derivative of $\Delta mobA$ carrying the <i>mobA</i> gene integrated at the <i>attB</i> locus; Hyg <sup>r</sup>                                                                                                                    | This work            |
| <u>Plasmids</u>                                            |                                                                                                                                                                                                                                    |                      |
| p2NIL                                                      | Cloning vector; Km <sup>r</sup>                                                                                                                                                                                                    | [1]                  |
| pGOAL17                                                    | Plasmid carrying <i>lacZ</i> and <i>sacB</i> genes as a <i>PacI</i> cassette; Ap <sup>r</sup>                                                                                                                                      | [1]                  |
| p2mobA                                                     | Knockout vector for creating unmarked deletion in <i>mobA</i> constructed by cloning PCR-amplified upstream and downstream flanks of <i>mobA</i> in p2NIL and insertion of <i>lacZ-sacB</i> cassette from pGOAL17; Km <sup>r</sup> | This work            |
| pMV306H                                                    | <i>E. coli-Mycobacterium</i> integrating shuttle vector. Derivative of pMV306 [2] carrying a <i>hyg</i> gene; Hyg <sup>r</sup>                                                                                                     | H. Boshoff           |
| pMobA                                                      | Derivative of pMV306H containing the <i>mobA</i> gene fused to the 300bp region upstream of <i>Rv2455c</i>                                                                                                                         | This work            |
| <u>Oligonucleotides</u>                                    |                                                                                                                                                                                                                                    |                      |
| TmobUF: <u>gcaagctt</u> CGACCATAT<br>GCTCCACCAG            | For amplification of the 2212 bp of upstream homologous sequence and 136 bp of the 5'-end of <i>mobA</i>                                                                                                                           | This work            |
| TmobUR: <u>cgaattc</u> CGAACTGTCC<br>AAGCACAAGA            |                                                                                                                                                                                                                                    | This work            |
| TmobDF: <u>cggtagc</u> TCGTTAGAAG<br>CGGTGCTC              | For amplification of the 59 bp of the 3'-end of <i>mobA</i>                                                                                                                                                                        | This work            |
| TmobDR: <u>gcaagctt</u> CGCTGACCAA<br>CGTCAAT              | and 2040 bp of downstream sequence                                                                                                                                                                                                 | This work            |
| TmobF: <u>cggtagc</u> TATCTCGAAAGG<br>CCACCAG              | For amplification of the 10 bp upstream <i>mobA</i> to 39 bases downstream of <i>mobA</i>                                                                                                                                          | This work            |
| TmobR: GTCGACTGACGTGGC<br>TGAG                             |                                                                                                                                                                                                                                    | This work            |
| promF: <u>ctcagccacgtcagtcgac</u> CTCC<br>GCCTTCCATGTGTTAT | For amplification of the 285bp region upstream of <i>Rv2455c</i>                                                                                                                                                                   | This work            |
| promR: <u>cggtagc</u> AAACCGTGGAT<br>TCGGATGT              |                                                                                                                                                                                                                                    | This work            |

Hyg<sup>r</sup> – Hygromycin resistant; Km<sup>r</sup> – Kanamycin resistant; Ap<sup>r</sup> – Ampicillin resistant

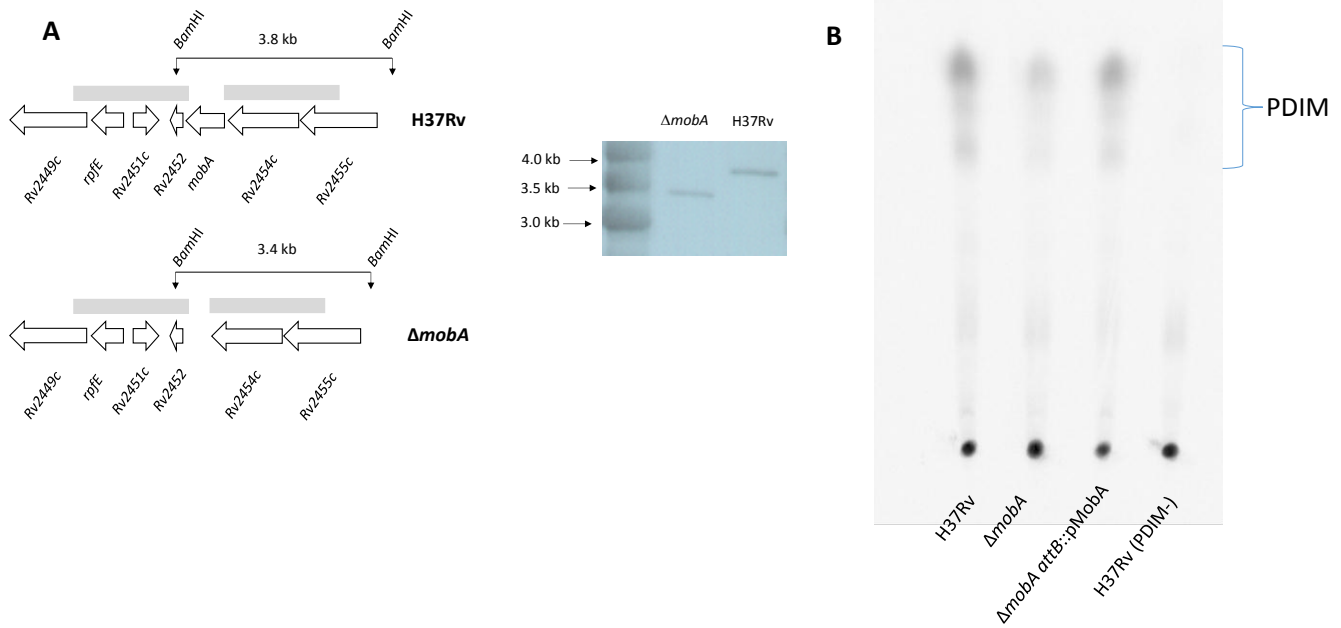

**Figure S1.** (A) Genotypic confirmation of the  $\Delta mobA$  mutant of *M. tuberculosis*. Left panel shows the restriction maps of the wild type (top) and the  $\Delta mobA$  mutant strains (bottom). Regions of homology that were cloned in the suicide vector used for allelic exchange mutagenesis are denoted by grey boxes. The upstream region of homology was used as a probe for Southern blotting. Right panel shows the hybridization pattern obtained by probing genomic DNA digested with *Bam*HI, Lane 1: Marker, Lane 2:  $\Delta mobA$ , Lane 3: H37Rv. Maps are not drawn to scale. (B) PDIM production by *M. tuberculosis* strains. PDIM production was measured by incorporation of  $^{14}\text{C}$  propionate. A strain known to be deficient in PDIM synthesis (lane 4) was used as a negative control.

## REFERENCES

1. Parish T, Stoker NG. Use of a flexible cassette method to generate a double unmarked *Mycobacterium tuberculosis* *tlyA plcABC* mutant by gene replacement. *Microbiology (Reading, Engl.)* **2000**; 146:1969-1975
2. Stover CK, de la Cruz VF, Fuerst TR, et al. New use of BCG for recombinant vaccines. *Nature* **1991**; 351:456-460
